# Supplementary material
Source: PubMed Central journal article supplement (PMC3779291)
Supplement: 12088_2013_403_MOESM1_ESM.pdf [file 12088_2013_403_MOESM1_ESM.pdf]

## Supplementary material

### Optimization of nutrient requirements and culture conditions for the production of rhamnolipid from *Pseudomonas aeruginosa* (MTCC 7815) using *Mesua ferrea* seed oil

Salam Pradeep Singh\*, Pranjali Bharali and Bolin Kumar Konwar

Department of Molecular Biology and Biotechnology, Tezpur University, Napaam, Tezpur 784028, Assam, India

\*Corresponding author e-mail: salampradeep@gmail.com

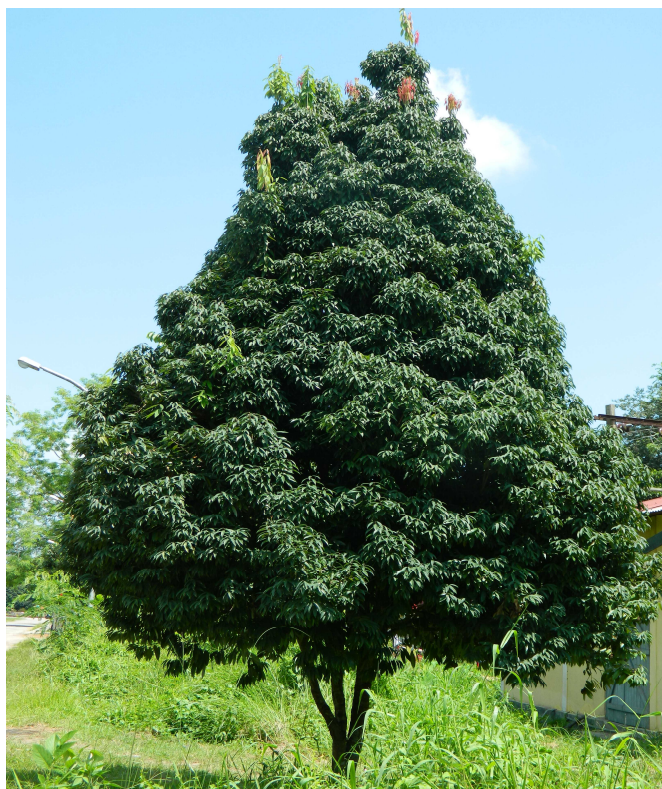

Fig S1. The habitat of the *Mesua ferrea*

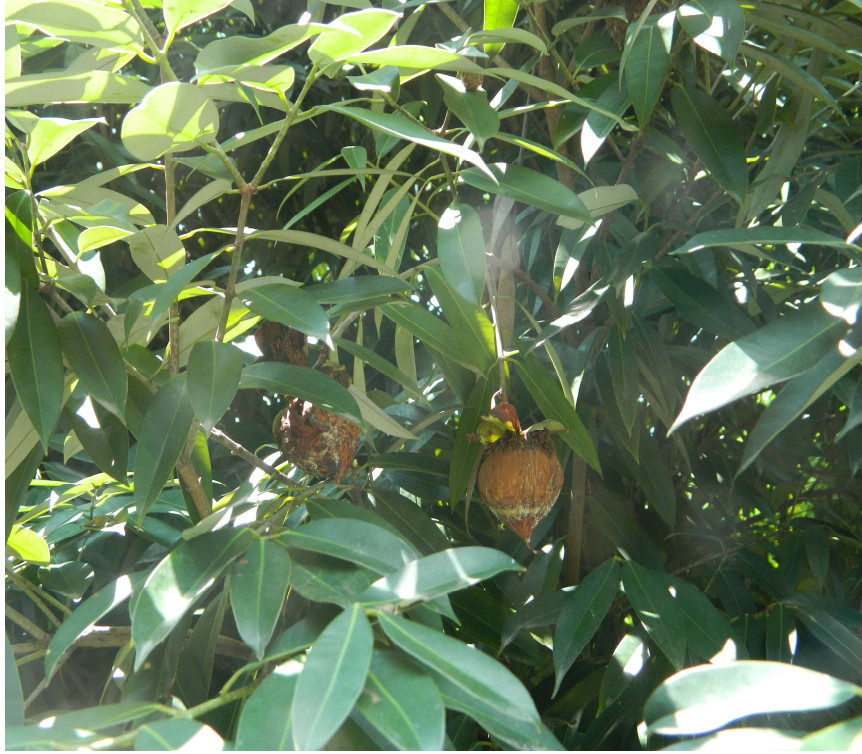

Fig S2. Seeds of *Mesua ferrea*

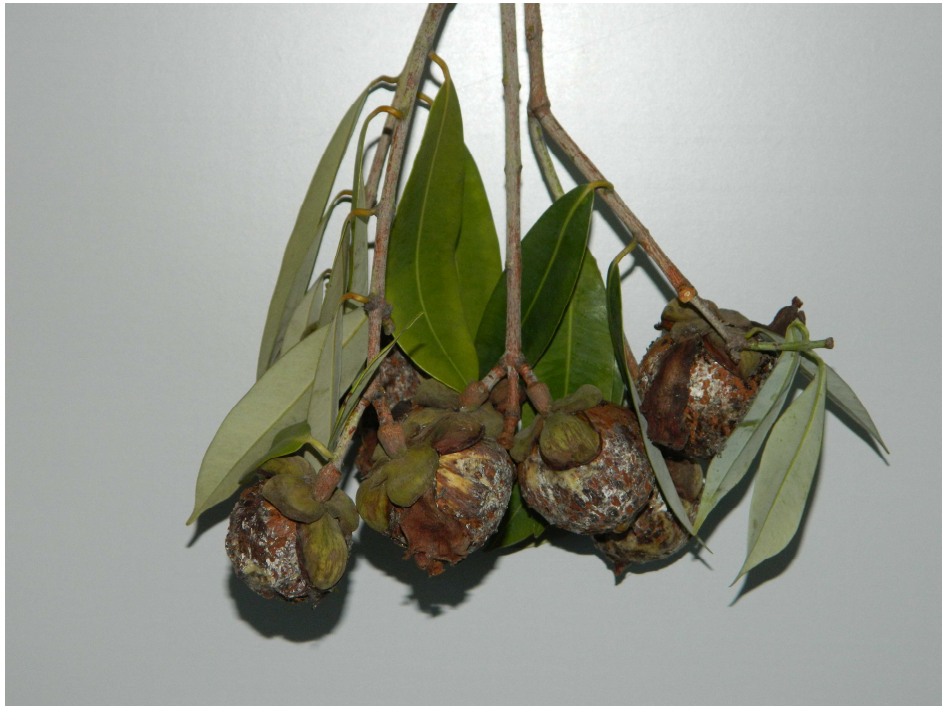

Fig S3. Seeds of *Mesua ferrea*

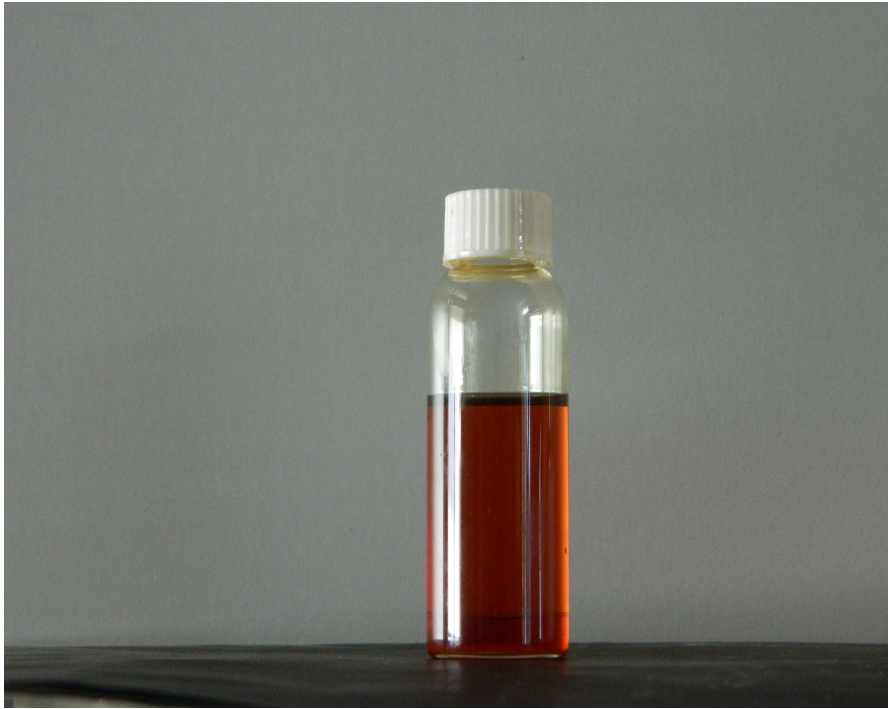

Fig S4. *Mesua ferrea* seed oil after extraction

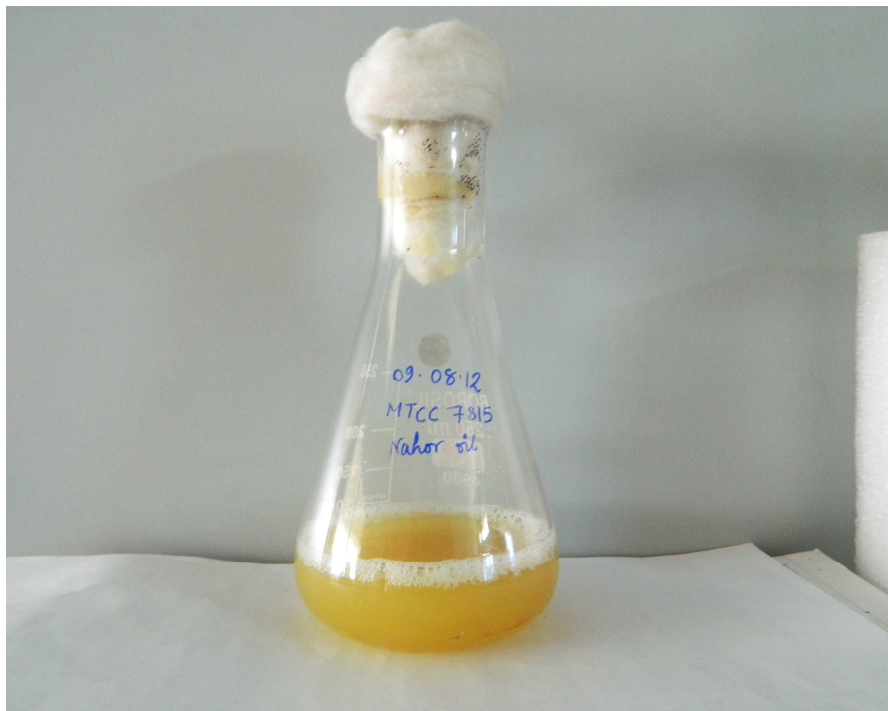

Fig S5. Fresh culture of *Pseudomonas aeruginosa* (MTCC 7815) supplemented with *Mesua ferrea* seed oil

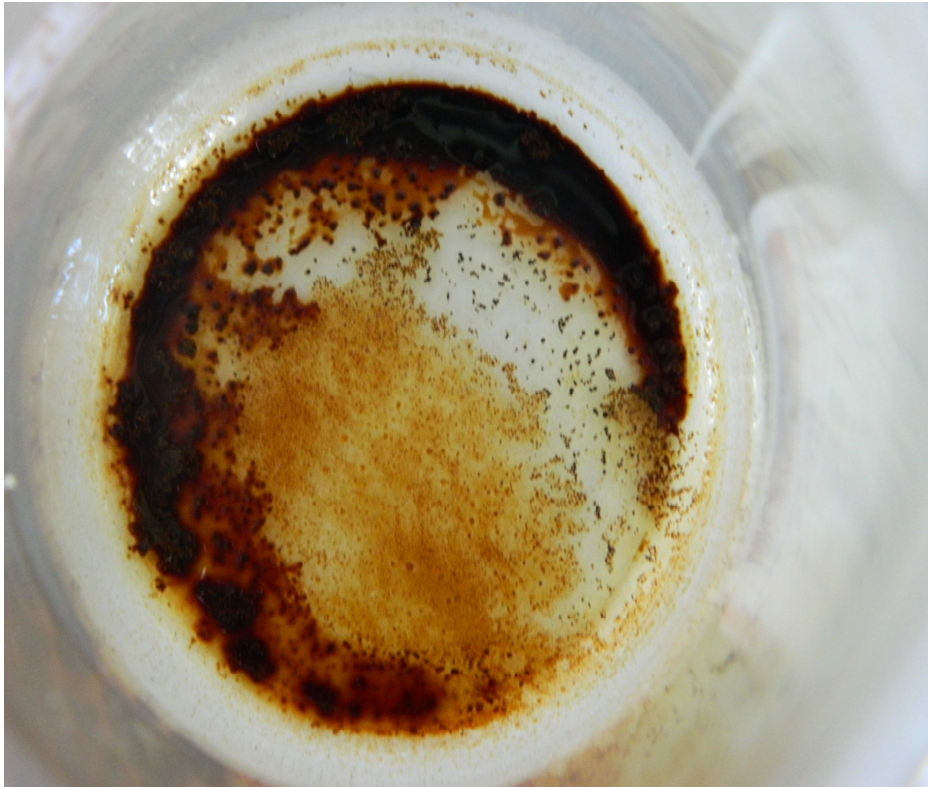

Fig S6. Isolated rhamnolipid after solvent extraction
